# Supplementary material
Source: JCI journal article supplement (doi:10.1172/jci169028)
Supplement: sd1 [file 1]

Supplemental Data for

“The latency reversing agent HODHBt synergizes with IL-15 to enhance cytotoxic function of HIV-specific T-cells”, by Copertino *et al*

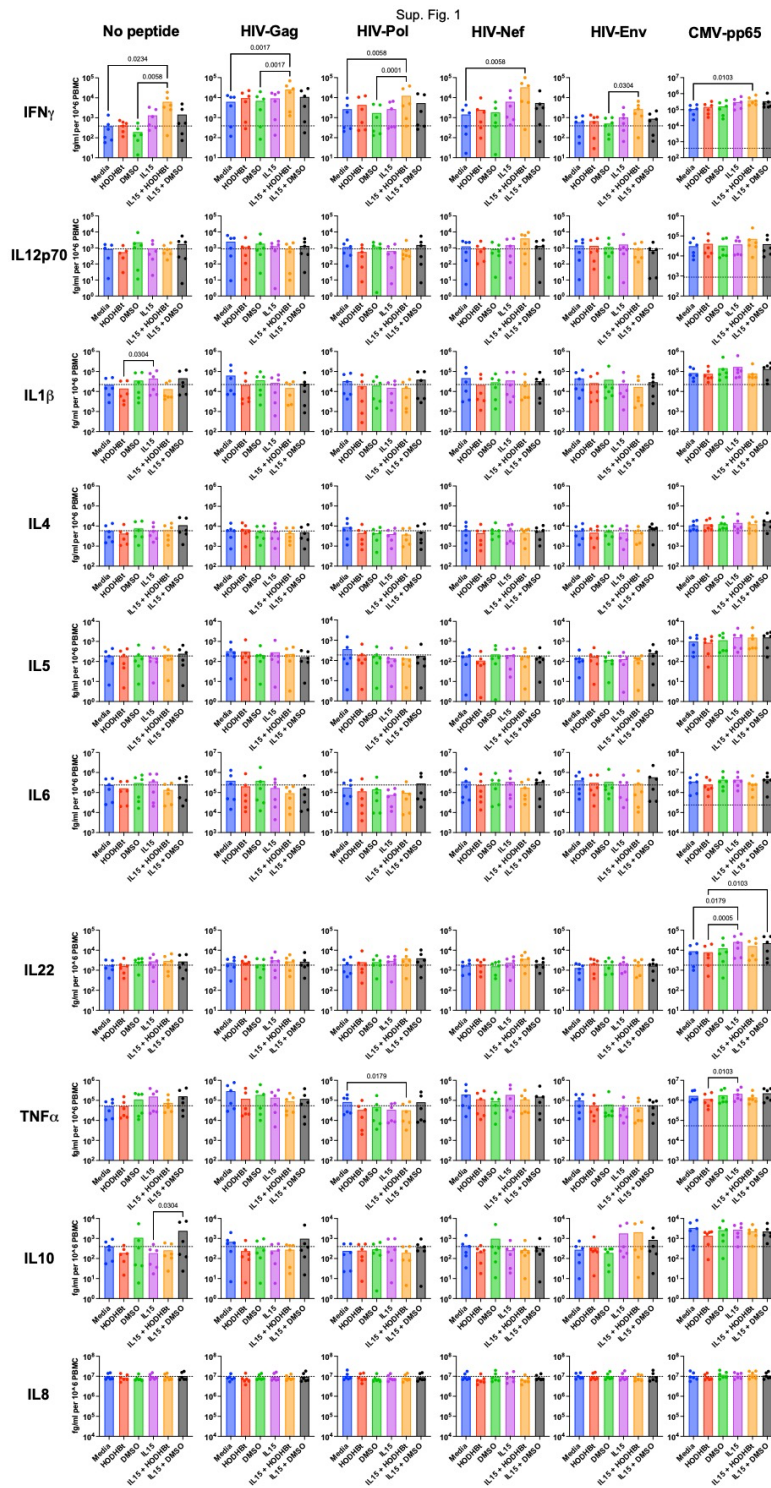

**Supplementary Figure 1.** Evaluation of cytokine secretion in the ELISPOT supernatants of 6 participants.

No Treatment (DMSO)

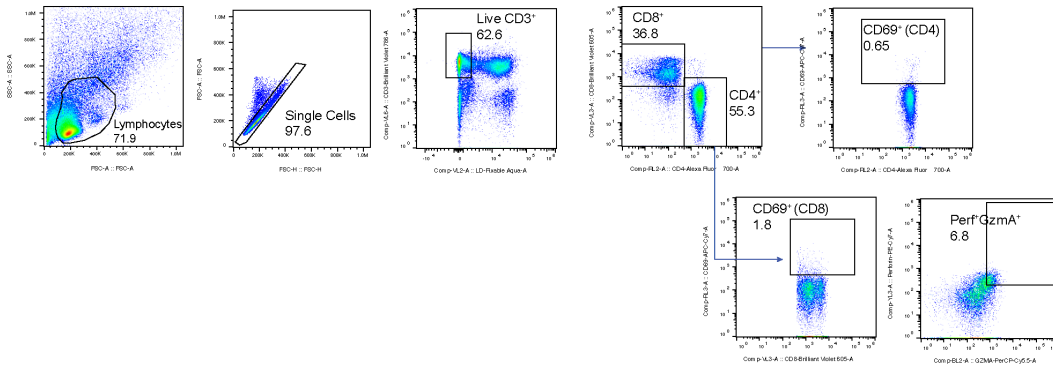

IL-15 + HODHBT

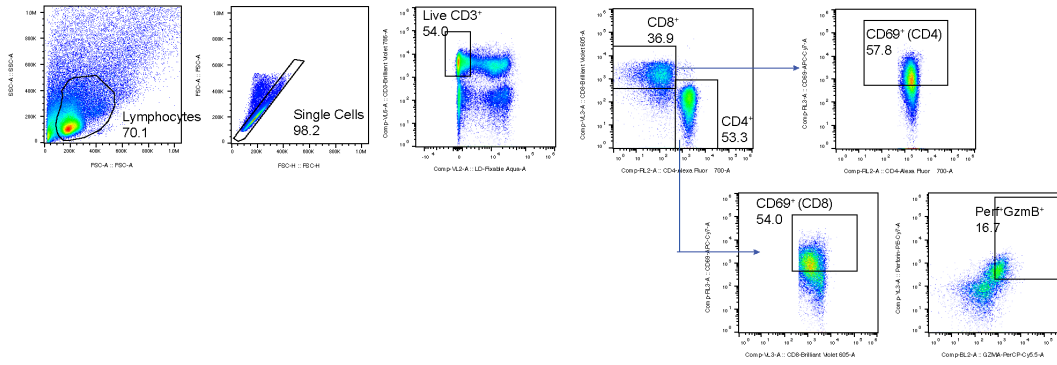

**Supplementary Figure 2.** Flow cytometry gating strategy used to assess HIV assays. Shown are day 3 results for donor OM5334.

**Supplementary Table 1.** Demographic and virologic parameters from A5321 study participants.

| <i>Participant ID</i> | <i>Age at A5321 entry (years)</i> | <i>Sex</i> | <i>Race, Ethnicity</i>        | <i>Years on ART at A5321 entry</i> | <i>Start date of initial ARV regimen</i> | <i>Year of ART initiation</i> | <i>Pre-ART CD4+ T-cell count (cells/mm<sup>3</sup>)</i> | <i>Pre-ART CD8+ T-cell count (cells/mm<sup>3</sup>)</i> | <i>A5321 entry CD4+ T-cell count (cells/mm<sup>3</sup>)</i> | <i>A5321 entry CD8+ T-cell count (cells/mm<sup>3</sup>)</i> | <i>A5321 entry ARV regimen</i> |
|-----------------------|-----------------------------------|------------|-------------------------------|------------------------------------|------------------------------------------|-------------------------------|---------------------------------------------------------|---------------------------------------------------------|-------------------------------------------------------------|-------------------------------------------------------------|--------------------------------|
| 13820                 | 52                                | Male       | Hispanic (Regardless of Race) | 4.3                                | 18-Jun-09                                | 2009                          | 261                                                     | 1014.5                                                  | 389                                                         | 624                                                         | FTC TDF RAL                    |
| 111834                | 46                                | Male       | White Non-Hispanic            | 11.5                               | 28-May-02                                | 2002                          | 97                                                      | 1694.5                                                  | 548                                                         | 660                                                         | FTC TDF EFV                    |
| 112213                | 46                                | Male       | Hispanic (Regardless of Race) | 4.2                                | 16-Jul-09                                | 2009                          | 410.5                                                   | 2066                                                    | 799                                                         | 1126                                                        | FTC TDF RTV DRV                |
| 112222                | 69                                | Female     | White Non-Hispanic            | 4.4                                | 9-Jul-09                                 | 2009                          | 155                                                     | 686.5                                                   | 281                                                         | 339                                                         | FTC TDF RAL                    |
| 141748                | 45                                | Female     | Black Non-Hispanic            | 7.4                                | 6-Jun-06                                 | 2006                          | 248.5                                                   | 730                                                     | 598                                                         | 445                                                         | FTC TDF EFV                    |
| 214356                | 31                                | Male       | White Non-Hispanic            | 4.4                                | 13-Jun-09                                | 2009                          | 322                                                     | 580                                                     | 760                                                         | 336                                                         | FTC TDF RAL                    |
| 232326                | 60                                | Female     | White Non-Hispanic            | 14.8                               | 18-Mar-99                                | 1999                          | 47                                                      | 195.5                                                   | 922                                                         | 965                                                         | 3TC ZDV EFV                    |
| 233303                | 38                                | Male       | White Non-Hispanic            | 7.1                                | 27-Nov-06                                | 2006                          | 447                                                     | 1829.5                                                  | 699                                                         | 853                                                         | FTC TDF EFV                    |
| 321348                | 44                                | Male       | White Non-Hispanic            | 7.4                                | 6-Sep-06                                 | 2006                          | 216.5                                                   | 889                                                     | 549                                                         | 898                                                         | ABC 3TC EFV                    |
| 362446                | 51                                | Female     | Black Non-Hispanic            | 7.3                                | 6-Sep-06                                 | 2006                          | 232                                                     | 800.5                                                   | 860                                                         | 810                                                         | FTC TDF EFV                    |
| 540827                | 46                                | Female     | Hispanic (Regardless of Race) | 14.3                               | 30-Jun-99                                | 1999                          | 524                                                     | 1112                                                    | 914                                                         | 764                                                         | DDI 3TC ATV                    |
| 541654                | 49                                | Female     | Hispanic (Regardless of Race) | 6.1                                | 1-Oct-07                                 | 2007                          | 304                                                     | 688                                                     | 718                                                         | 1017                                                        | FTC TDF RTV ATV                |
| 580740                | 58                                | Male       | White Non-Hispanic            | 7.5                                | 11-Jul-06                                | 2006                          | 283.5                                                   | 1555                                                    | 808                                                         | 892                                                         | FTC TDF RAL                    |
| 611097                | 37                                | Female     | Hispanic (Regardless of Race) | 7.1                                | 10-Nov-06                                | 2006                          | 332.5                                                   | 636.5                                                   | 892                                                         | 531                                                         | FTC TDF RTV ATV                |

**Supplementary Table 2.** Demographic and virologic parameters from Maple Leaf Clinic participants.

| <i>Participant ID</i> | <i>Age at Sample Collection (years)</i> | <i>Sex</i> | <i>Race, Ethnicity</i> | <i>Duration of undetectable viral Load (months)</i> | <i>ARV regimen</i>   | <i>Viral Load (Copie/ml)</i> | <i>Estimated Time Between infection and ART (months)</i> |
|-----------------------|-----------------------------------------|------------|------------------------|-----------------------------------------------------|----------------------|------------------------------|----------------------------------------------------------|
| OM5011                | 46                                      | M          | White Non-Hispanic     | 133                                                 | 3TC ABC DTG          | <50                          | 38                                                       |
| OM5267                | 28                                      | M          | White Non-Hispanic     | 91                                                  | 3TC ABC RAL          | <50                          | 4                                                        |
| OM5334                | 34                                      | M          | White Non-Hispanic     | 63                                                  | TAF FTC EVG COBI RPV | <50                          | 2                                                        |

## Supplemental Acknowledgments

We would like to acknowledge all the members of the A5321 team, including Evelyn Hogg, Rebecca LeBlanc, Christine Scello, David Palm, Monica Gandhi, Courtney Fletcher, Catherine Godfrey, Anthony Podany, Elias Halvas, Joan Dragavon, Jeymohan Joseph, Rose Lagattuta, Leyi Lin, Hannah Mar, Susan Pederson, Kevin Robertson, Leah Rubin, Serena Spudich, Bernadette Jarocki, Sean Avedissian, Ann Collier, Jonathan Li, Sharon Riddler, Aimee Willett, Charles Rinaldo Jr., and Jenny Nguyen.

Below is a listing of all of the above individuals and their affiliations.

| Name            | Affiliation                                                                                                                  |
|-----------------|------------------------------------------------------------------------------------------------------------------------------|
| Evelyn Hogg     | ACTG Network Coordinating Center Social & Scientific Systems<br>8757 Georgia Avenue, 12th Floor Silver Spring, MD 20910-3714 |
| Rebecca LeBlanc | Frontier Science & Technology Research Foundation, Inc.<br>4033 Maple Road<br>Amherst, NY 14226                              |

|                      |                                                                                                                                                                |
|----------------------|----------------------------------------------------------------------------------------------------------------------------------------------------------------|
|                      |                                                                                                                                                                |
| Christine Scello     | Frontier Science & Technology Research Foundation, Inc.<br>Data Management Center<br>4033 Maple Road<br>Amherst, NY 14226-1056                                 |
| David Palm           | Chapel Hill CRS<br><br>P.O. Box 12161<br>Research Triangle Park, NC 27709                                                                                      |
| Monica Gandhi        | University of California San Francisco Division of HIV/AIDS,<br>Box 1352<br>405 Irving Street, 2nd Floor<br>San Francisco, CA 94122-1352                       |
| Courtney V. Fletcher | College of Pharmacy<br>University of Nebraska Medical Center 986000 Nebraska<br>Medical Center Omaha, NE 68198-6000                                            |
| Catherine Godfrey    | HIV Research Branch TRP/DAIDS/NIAID/NIH<br><br>5601 Fishers Lane Room 9E49 MSC 9830<br>Bethesda, MD 20852-9830                                                 |
| Anthony Podany       | Antiviral Pharmacology Laboratory College of Pharmacy, RM<br>4007 University of Nebraska Medical Center 986045 Nebraska<br>Medical Center Omaha, NE 68198-6045 |
| Elias Halvas         | University of Pittsburgh Virology Support Laboratory<br>Division of Infectious Diseases S813 Scaife Hall<br>3550 Terrace Street<br>Pittsburgh, PA 15261        |
| Joan Dragavon        | Virology Specialty Laboratory University of Washington<br>Research & Training Building<br>300 9th Avenue, Room 725<br>Seattle WA 98104-2499                    |

|                   |                                                                                                                                                              |
|-------------------|--------------------------------------------------------------------------------------------------------------------------------------------------------------|
|                   |                                                                                                                                                              |
| Jeymohan Joseph   | HIV Neuropathogenesis and Treatment Branch<br>National Institute of Mental Health Room 6219, MSC 9619<br>6001 Executive Boulevard<br>Bethesda, MD 20892-9619 |
| Rose Lagattuta    | 11075 Santa Monica Boulevard, Ste. 200 Los Angeles, CA<br>90025                                                                                              |
| Leyi Lin          | 5601 Fishers Lane<br><br>MSC 9830, Room 9E47 Rockville, MD 20852                                                                                             |
| Hanna Mar         | Statistical and Data Analysis Center Harvard School of Public<br>Health FXB 643A<br>Boston, MA 02115                                                         |
| Susan Pedersen    | University of North Carolina at Chapel Hill Bioinformatics<br>Building, Suite 2100<br>130 Mason Farm Road<br>Chapel Hill, NC 27599-7215                      |
| Kevin Robertson   | Chapel Hill CRS<br>Department of Neurology<br>2128 Physician Office Building 170 Manning Drive<br><br>Chapel Hill, NC 27599-7025                             |
| Leah H. Rubin     | Department of Neurology Johns Hopkins University 600 N.<br>Wolfe Street<br>Meyer 6-113a<br>Baltimore MD 21287                                                |
| Serena S. Spudich | Cornell CRS<br>Yale University<br>PO Box 208018                                                                                                              |

|                     |                                                                                                                                                           |
|---------------------|-----------------------------------------------------------------------------------------------------------------------------------------------------------|
|                     | 15 York Street<br>New Haven, CT 06520                                                                                                                     |
| Bernadette Jarocki  | Frontier Science & Technology Research Foundation, Inc.<br>4033 Maple Road<br>Amherst, NY 14226-1056                                                      |
| Sean Avedissian     | University of Nebraska Medical Center 42nd and Emile<br>Omaha NE 68198                                                                                    |
| Ann Collier         | University of Washington School of Medicine<br>Harborview Medical Center<br>Box 359929<br>325 9th Avenue<br>Seattle, WA 98104                             |
| Jonathan Li         | Brigham and Women's Hospital 65 Landsdowne Street, Rm<br>421 Cambridge, MA 02139                                                                          |
| Sharon Riddler      | University of Pittsburgh CRS 3520 Fifth Avenue<br>Keystone Building, Suite 510 Pittsburgh, PA 15213-2582                                                  |
| Aimee Willett       | Frontier Science & Technology Research Foundation, Inc. 4033<br>Maple Road Amherst, NY 4226-1056                                                          |
| Charles Rinaldo Jr. | Infectious Diseases & Microbiology University of Pittsburgh<br>A419 Crabtree Hall 130 DeSoto Street Pittsburgh, PA 15261<br>Phone: 412-624-3928           |
| Jenny Nguyen        | Laboratory Science Group ACTG Network Coordinating<br>Center Social & Scientific Systems, Inc. 8757 Georgia Avenue,<br>12th Floor Silver Spring, MD 20910 |
